# Supplementary material for: Improved methodologies for Earth system modelling of atmospheric soluble iron and observation comparisons using the Mechanism of Intermediate complexity for Modelling Iron (MIMI v.1.0)
Source: Copernicus journal article supplement (doi:10.5194/gmd-2019-84), 2019-05-06
Supplement: Supplementary file 1 [file gmd-2019-84-supplement.pdf]

1 Table S1: Description of the source regions in Fig. 1.

| Acronym | Region                                  | Latitude                                 | Longitude                                      | Notes                                                                                                                                                 |
|---------|-----------------------------------------|------------------------------------------|------------------------------------------------|-------------------------------------------------------------------------------------------------------------------------------------------------------|
| ARAB    | Arabian Peninsula & surrounding regions | 0 to 50°N                                | 37.5 to 67.5°E                                 | Southern border includes Horn of Africa to incorporate dust emissions from there that are not found at the same latitude westward (Luo et al., 2008). |
| ASIA    | Asia                                    | 10°S to 30°N<br>30 to 50°N<br>50 to 90°N | 67.5 to 180°E<br>110 to 180°E<br>52.5 to 180°E | Excludes major desert regions.                                                                                                                        |
| AUS     | Australia and New Zealand               | 10 to 90°S                               | 67.5 to 180°E                                  | Northern limit defined by general model ITCZ location.                                                                                                |
| CAF     | Central Africa                          | 0 to 15°N                                | 45°W to 37.5°E                                 | Northern border separates dust and combustion emission sources.                                                                                       |
| CEAS    | Central Asia                            | 30 to 50°N                               | 67.5 to 110°E                                  | Major desert region.                                                                                                                                  |
| EUR     | Europe                                  | 30 to 50°N<br>50 to 90°N                 | 45°W to 37.5°E<br>45°W to 52.5°E               | The border between Europe and Asia is along the Volga River (forested land to the west and shrubland to the east (Loveland et al., 2000)).            |
| NAF     | North Africa                            | 15 to 30°N                               | 45°W to 37.5°E                                 |                                                                                                                                                       |
| NAM     | North America                           | 0 to 90°N                                | 45 to 180°W                                    | The eastern border extends through western Greenland to capture combustion emissions off the east coast of the United States.                         |
| SAF     | South Africa                            | 0 to 90°S                                | 30°W to 67.5°E                                 | Northern limit defined by general model ITCZ location.                                                                                                |
| SAM     | South America                           | 0 to 90°S                                | 30 to 180°W                                    | Northern limit defined by general model ITCZ location.                                                                                                |

2

3

4 **Table S2.** Dust atmospheric lifetime (days) in BAM-Fe (CAM4) and MIMI (CAM5). Global annual  
 5 total emissions of dust also shown under model name.

|                            | Dust lifetime /days    |                      |
|----------------------------|------------------------|----------------------|
|                            | BAM-Fe<br>(1800 Tg /a) | MIMI<br>(3200 Tg /a) |
| Fine/Accumulation          | 10                     | 6.5                  |
| Coarse                     | 3.8                    | 2.0                  |
| Fine/Accumulation + Coarse | 3.9                    | 2.1                  |

6  
7  
8

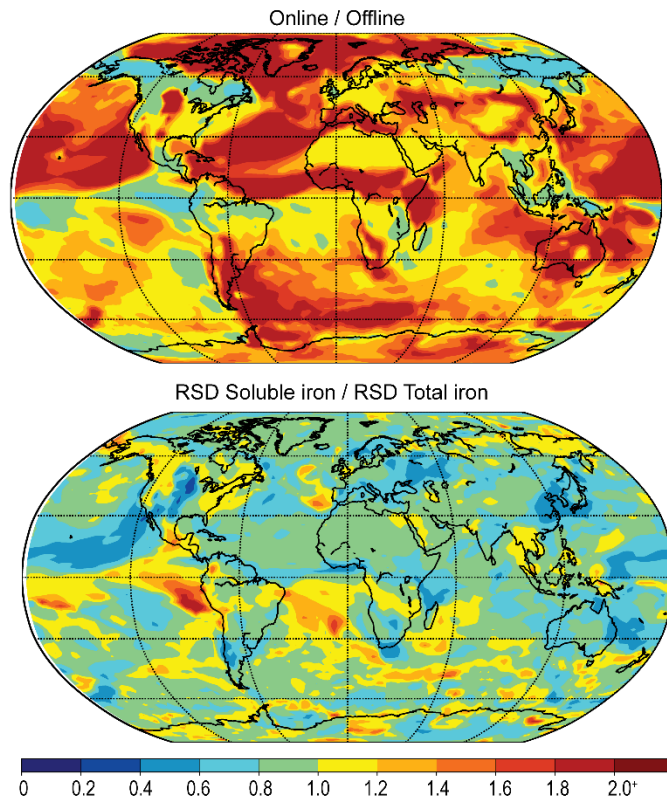

9

10 **Figure S1. Top:** Ratio of the online and offline calculation for iron solubility. **Bottom:** Ratio of  
 11 relative standard deviation (RSD) of soluble and total iron.

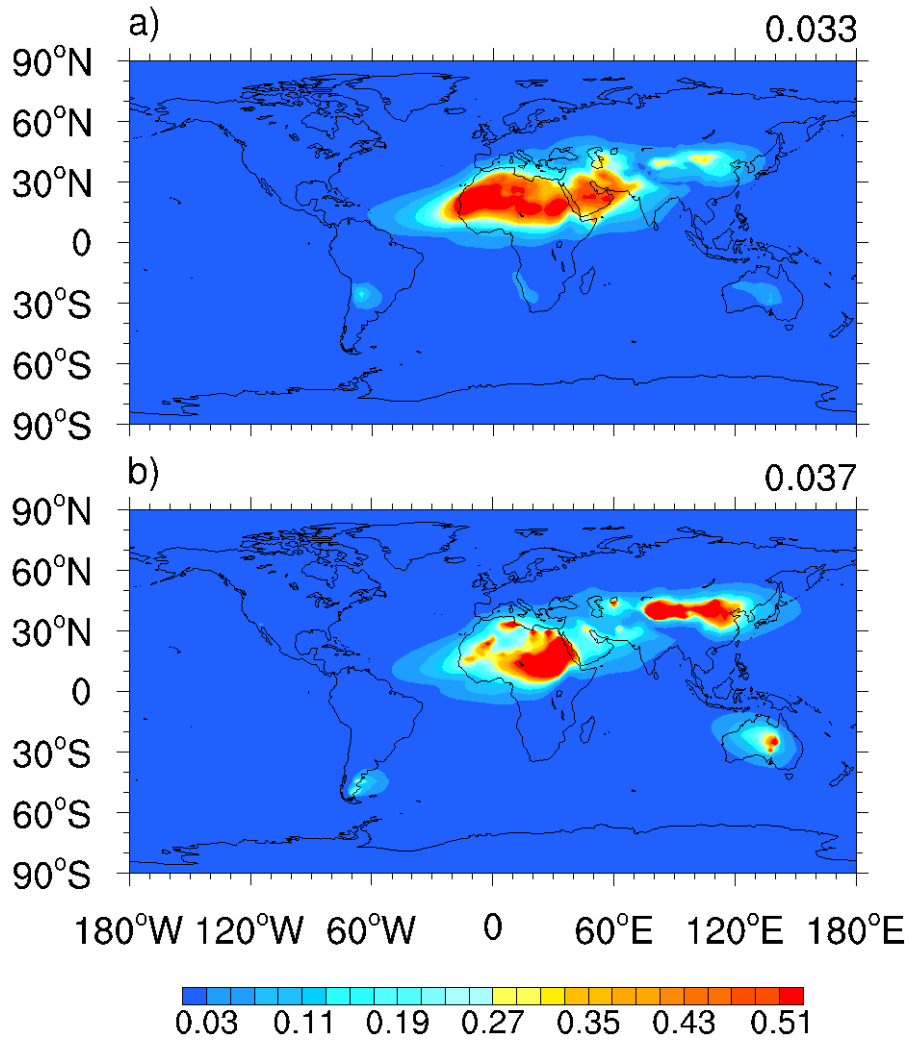

12

13

14 **Figure S2.** Dust aerosol optical depth within CAM5 MAM4 using the Kok et al. (a), and DEAD

15 (b) schemes. Numbers on the top right of each panel represent the globally means.

16

17

18

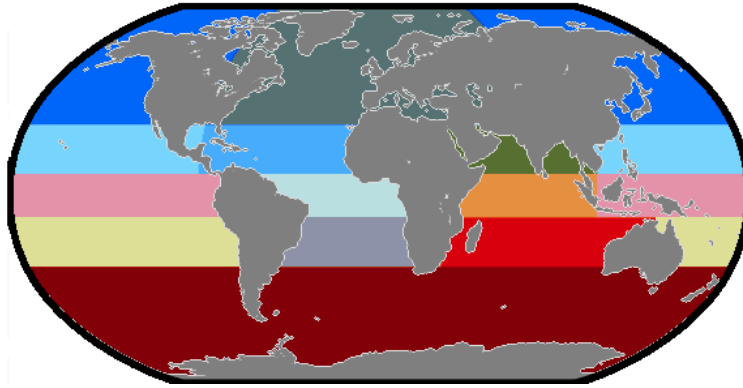

19

20

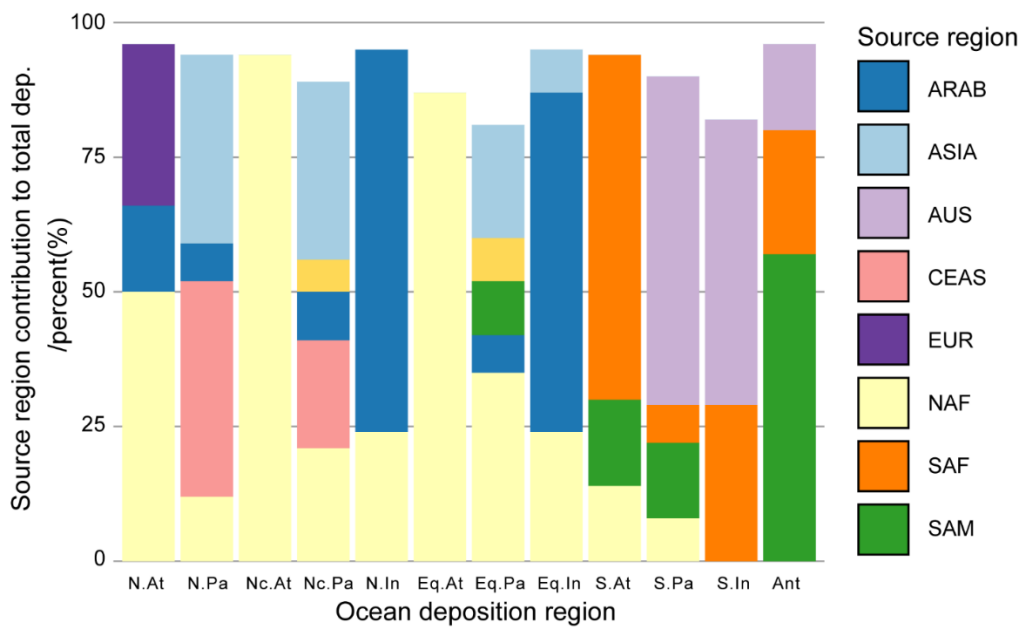

21

22

23 **Figure S3. Top:** Boundary of each ocean regions as defined in Gregg et al. (2003). Note that  
 24 colours bear no relationship to any other figure. **Bottom:** Contribution of each emission source  
 25 region (Fig. 1) to the total iron deposition across the region as defined in Gregg et al. (2003).  
 26 Regions contributing <5% filtered out.

27

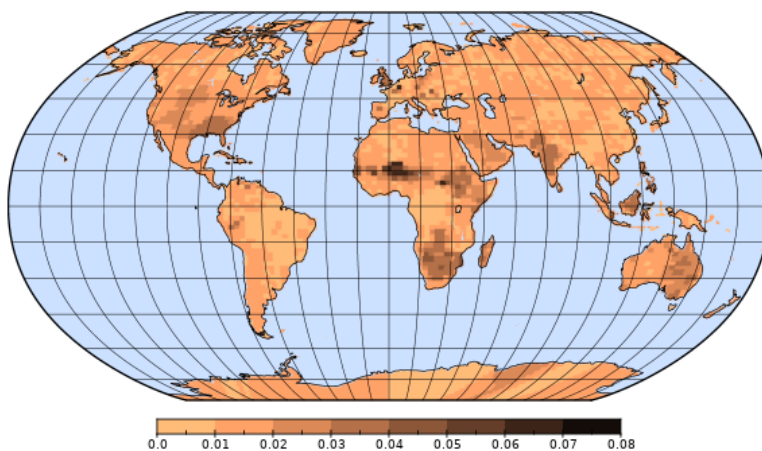

28

29 **Figure S4.** Fraction of the soil mineral which is hematite in MIMI.

30

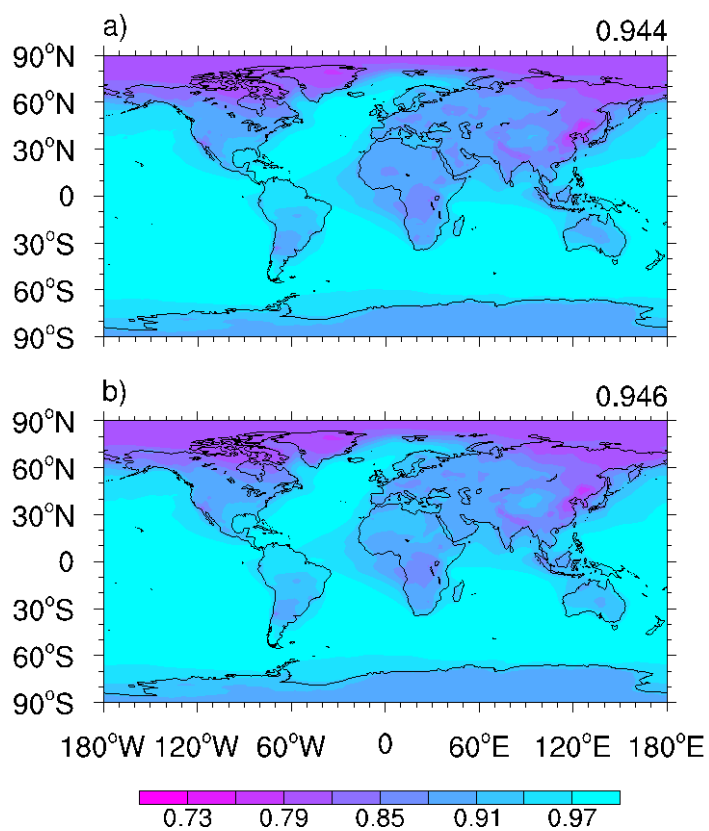

31

32

33 **Figure S5.** Single scattering albedo with hematite from both clay and silt minerals (a), and solely  
 34 from clay minerals (b). Numbers on the top right of each panel represent the globally means.
